# Supplementary material
Source: publisher figshare collection journal article supplement (https://brill.figshare.com/articles/dataset/_/25688730)
Supplement: Supplementary file 1 [file 2]

**Data for: No evidence that Mycoplasma infection causes cognitive impairment during foraging in Allenby’s gerbil (Gerbillus andersoni allenbyi)**

Give a brief summary of dataset contents, contextualized in experimental procedures and results.

**Description of the data and file structure**

***Metadata for GUD data - Micropatch experiment***

- Date - Night of which data was collected. For example "20/12/2022" is the night of December 20th - December 21, 2022

- Moon_Phase - Phase of moon. Data collection occurred for 6 nights around each moon phase (3 nights before, 3 nights after)

- Quadrant - Quadrant of vivarium gerbils were housed in.

- Infection - Infection status of gerbils in the quadrant where data was collected

- Shade - The ID for the trellis the set of trays was under

- Full_ID - The ID of the tray with seeds mixed in the whole tray

- 1_bound_ID - The ID of the tray with seeds mixed in one half of the tray with a single vague boundary

- 2_bound_ID - The ID of the tray with seeds mixed in one half of the tray with two vague boundaries

- GUD_full - Giving up density (GUD) full tray

- GUD_1_boundary - GUD of 1 boundary tray

- GUD_2_boundary - GUD of 2 boundary tray

- COMP_1boundary - COMP score for 1 boundary tray, equal to GUD_1_boundary/GUD_full - renamed to COMP1 in analysis

- COMP_2boundary - COMP score for 2 boundary tray, equal to GUD_2_boundary/GUD_full - renamed to COMP2 in analysis

- Phase - 1= acute phase, 2=chronic phase

- Gerbil group - group of gerbils seed trays were foraged by. In phase 1, 24 gerbils were randomly split into two groups, 12 of which were infected, 12 of which were uninfected. These two groups were further randomly split into 2 groups, each of which went in a separate quadrant. In phase 2, the surviving infected gerbils were combined in one quadrant. The uninfected gerbils were mixed an re-randomly split into two groups which went into two quadrants of the vivarium

***Metadata for GUD data - Equalizing experiment***

- Date - Night of which data was collected. For example "20/12/2022" is the night of December 20th - December 21, 2022

- Moon_Phase - Phase of moon. Data collection occurred for 6 nights around each moon phase (3 nights before, 3 nights after)

- Quadrant - Quadrant of vivarium gerbils were housed in.

- Infection - Infection status of gerbils in the quadrant where data was collected

- Shade - The ID for the trellis the set of trays was under

-6g_trayID - ID of tray with 6g of seed; "Rich" tray

3g_tray_ID - ID of tray with 3g of seed; "Poor" tray

-GUD_6g - GUD of 6g tray

-GUD_3g - GUD of 3g tray

-Ratio - Ratio of GUD_6g:GUD_3g

-Ratio_Over3Correct - Ratio of GUD_6g:GUD_3g using 3g as the GUD_6g if the GUD6g was greater than 3 - see paper for more detail

- Phase - 1= acute phase, 2=chronic phase

- Gerbil group - group of gerbils seed trays were foraged by. In phase 1, 24 gerbils were randomly split into two groups, 12 of which were infected, 12 of which were uninfected. These two groups were further randomly split into 2 groups, each of which went in a separate quadrant. In phase 2, the surviving infected gerbils were combined in one quadrant. The uninfected gerbils were mixed an re-randomly split into two groups which went into two quadrants of the vivarium

***Metadata for temperature data*** - data downloaded from the Israeli meteorological survey, IMS (<https://ims.gov.il/en/data_gov)>. The data consists of temperature, humidity, and wind readings taken every 10 minutes from 2:00am on 18/12/22 to 8:00am on 24/3/2023.

- Date - The day on which the reading was collected - Does not correspond with the date of the GUD data.

- Time -The time of the observation was recorded

- Station - all from Sde Boker

- Temperature measurements - see website for more detail

- Night of - The night of which the data was collected, corresponding to "date" in the GUD data. Nights were defined as 17:00-7:00. Observations taken between 7:00 - 17:00 have an X for this variable. Added by me, not from the IMS

***Metadata for numbers data***

- Final number of gerbils found in each gerbil group at the end of the phase, after trapping for at least three nights and confirming no tracks on seed trays after trapping.
